# Supplementary material for: Flow Cytometry Detection of Anthracycline-Treated Breast Cancer Cells: An Optimized Protocol
Source: MDPI journal article supplement (doi:10.3390/cimb45010013), 2022-12-28
Supplement: s1 [file s1]

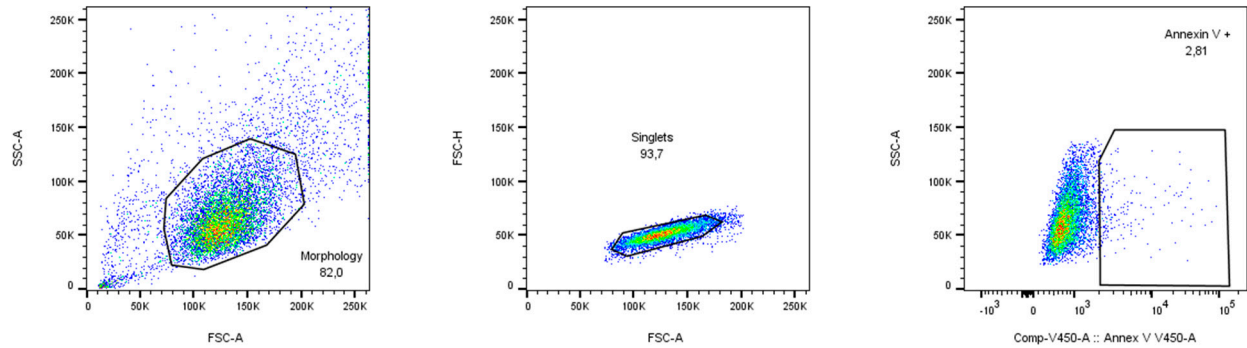

**Figure S1. Gating strategy of Annexin V MDA-MB-231 cells.** MDA-MB-231 cells were selected in a FCS-A/SSC-A gate; next doublets were excluded (FSC-A/FSC-H) and Annexin V+ cells were gated (Annexin V-A/SSC-A).

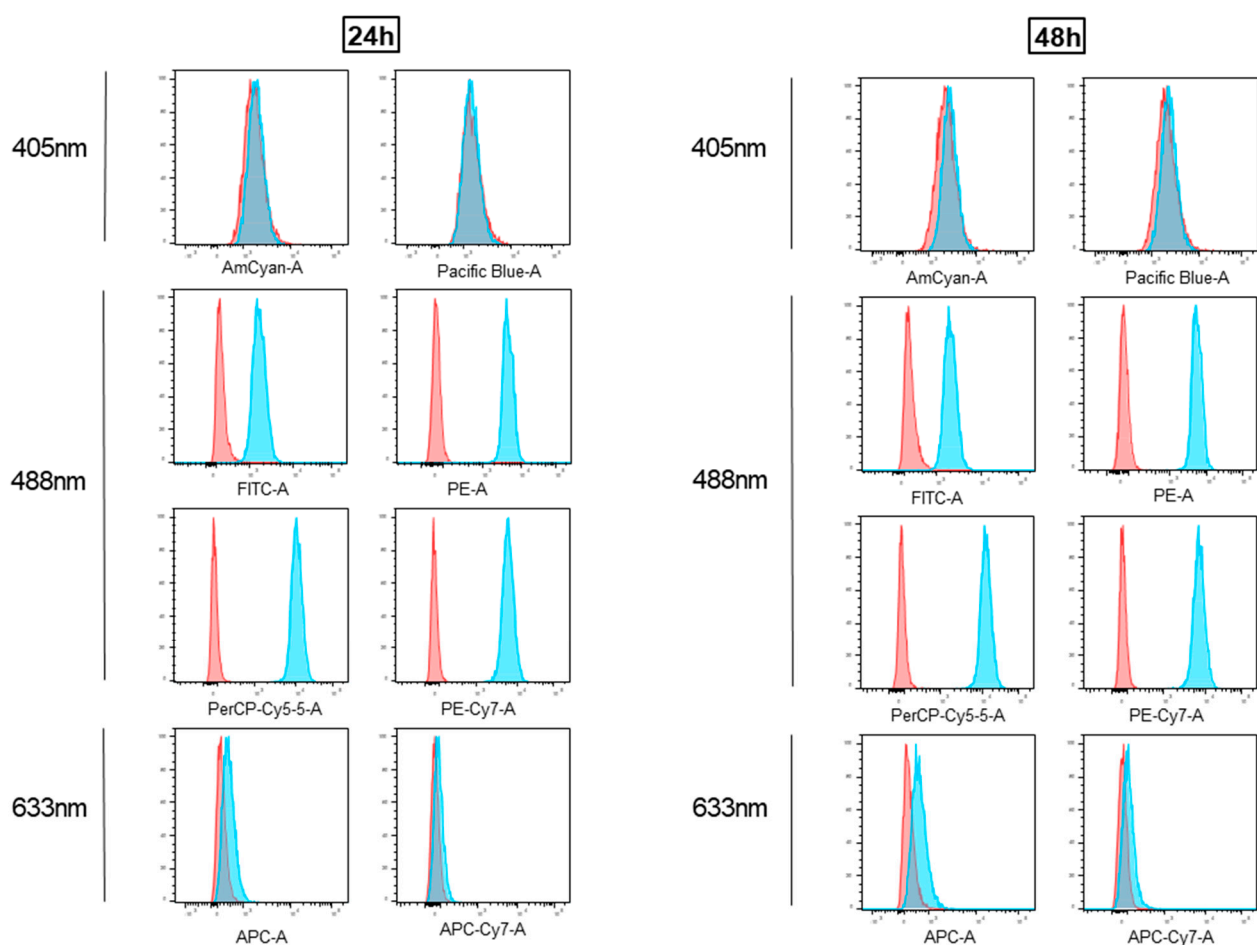

**Figure S2. Analysis of Doxorubicin fluorescence emission by a FACSCanto II.** Cells treated for 24 and 48h with 1 $\mu$ M (Panel A) or 2.5  $\mu$ M (Panel B) Doxorubicin (Doxo) were acquired by flow cytometry and shown as blue histograms on every channel of a conventional instrument BD FACSCanto II, equipped with three lasers (488nm, 633nm and 405nm). Overlaid red histograms show the related untreated samples. Data are representative of three separate experiments.

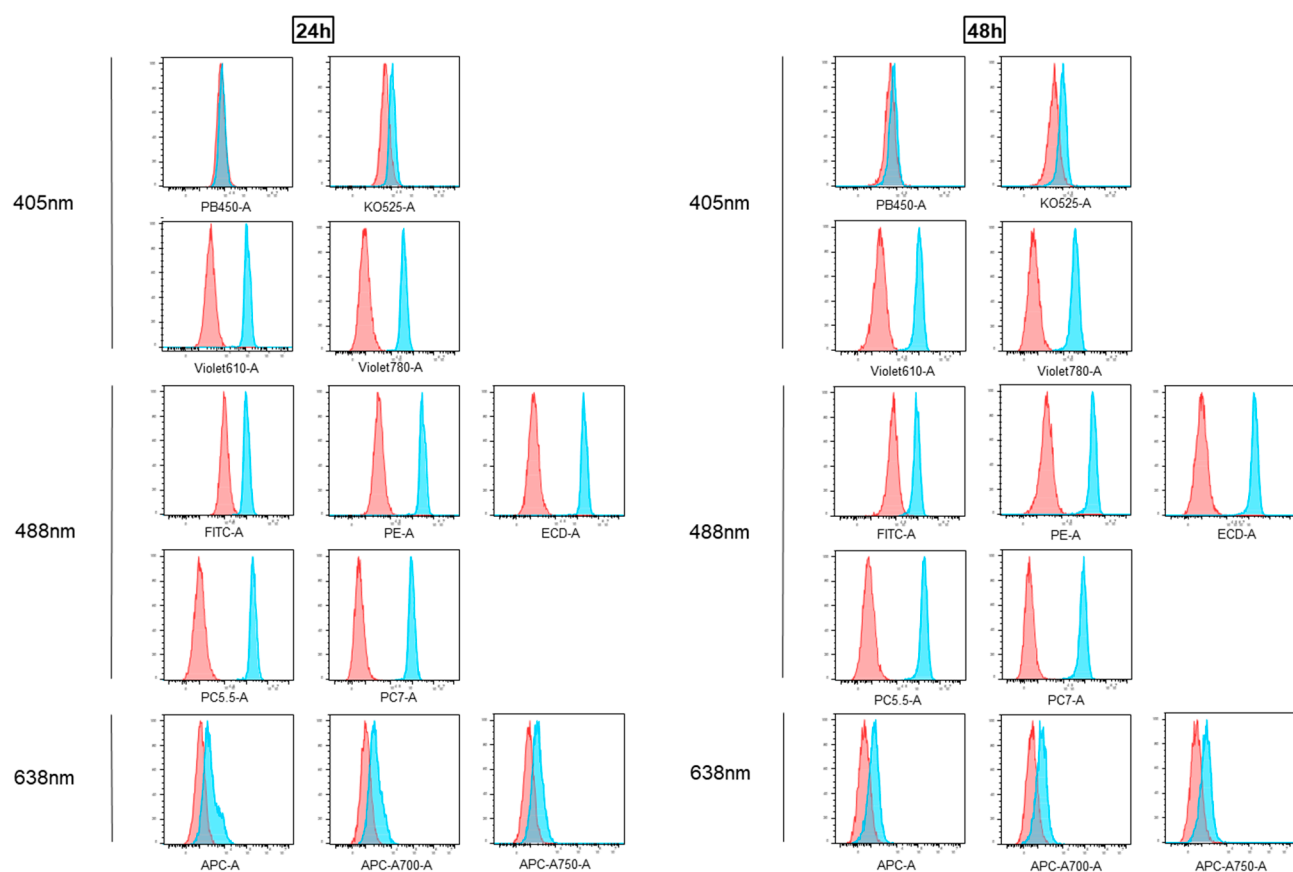

**Figure S3. Analysis of Doxorubicin fluorescence emission by a CytoFLEX.** Cells treated for 24 and 48h with 1 $\mu$ M (**Panel A**) or 2.5  $\mu$ M (**Panel B**) Doxorubicin (Doxo) were acquired by flow cytometry and shown as blue histograms on every channel of a conventional instrument BC CytoFLEX, equipped with three lasers (488nm, 633nm and 405nm). Overlaid red histograms show the related untreated samples. Data are representative of three separate experiments.

**A**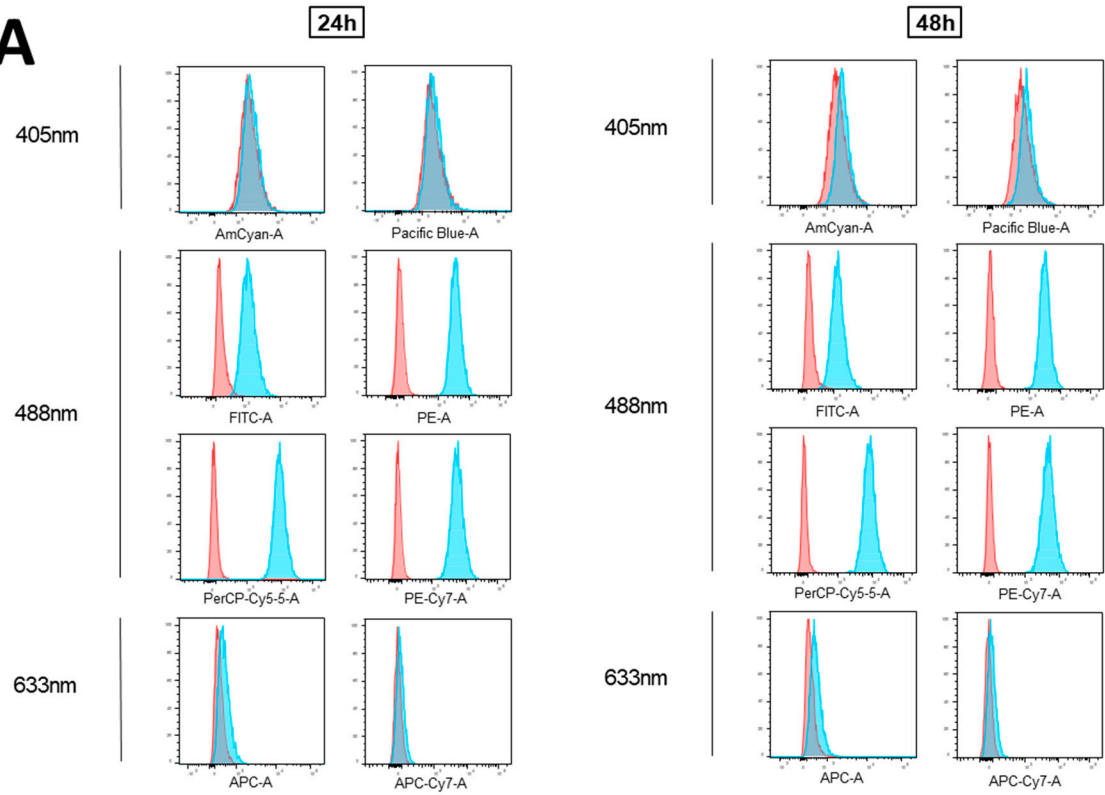**B**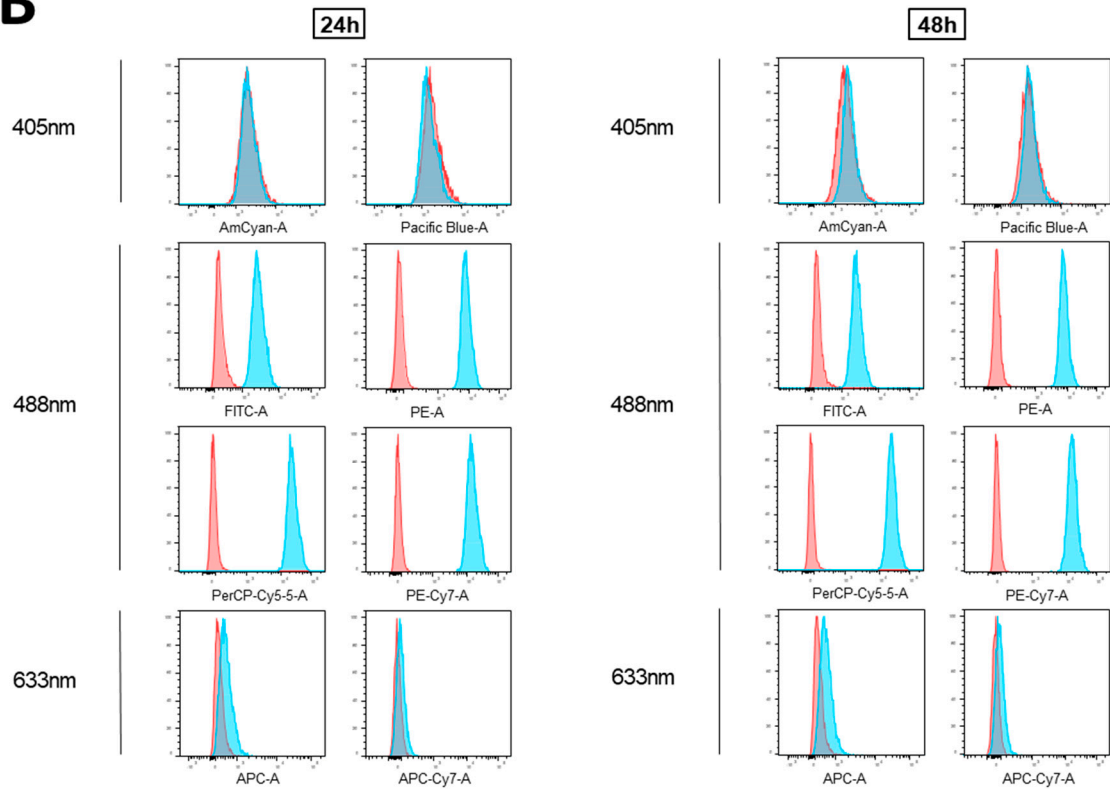

**Figure S4. Analysis of Epirubicin fluorescence emission by a FACSCanto II.** Cells treated for 24 and 48h with 1 $\mu$ M (**Panel A**) or 2.5  $\mu$ M (**Panel B**) Epirubicin were acquired by flow cytometry and shown as blue histograms on every channel of a conventional instrument BD FACSCanto II, equipped with three lasers (488nm, 633nm and 405nm). Overlaid red histograms show the related untreated samples. Data are representative of three separate experiments.

**A**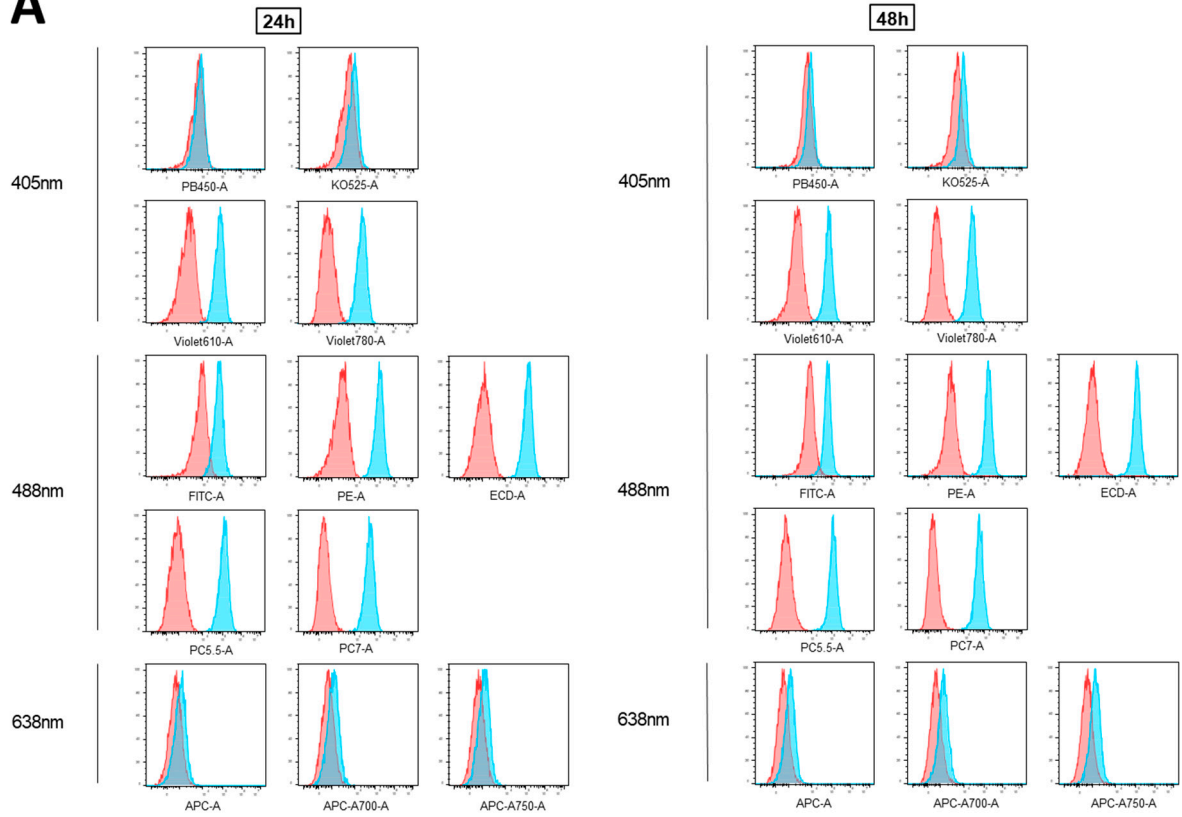**B**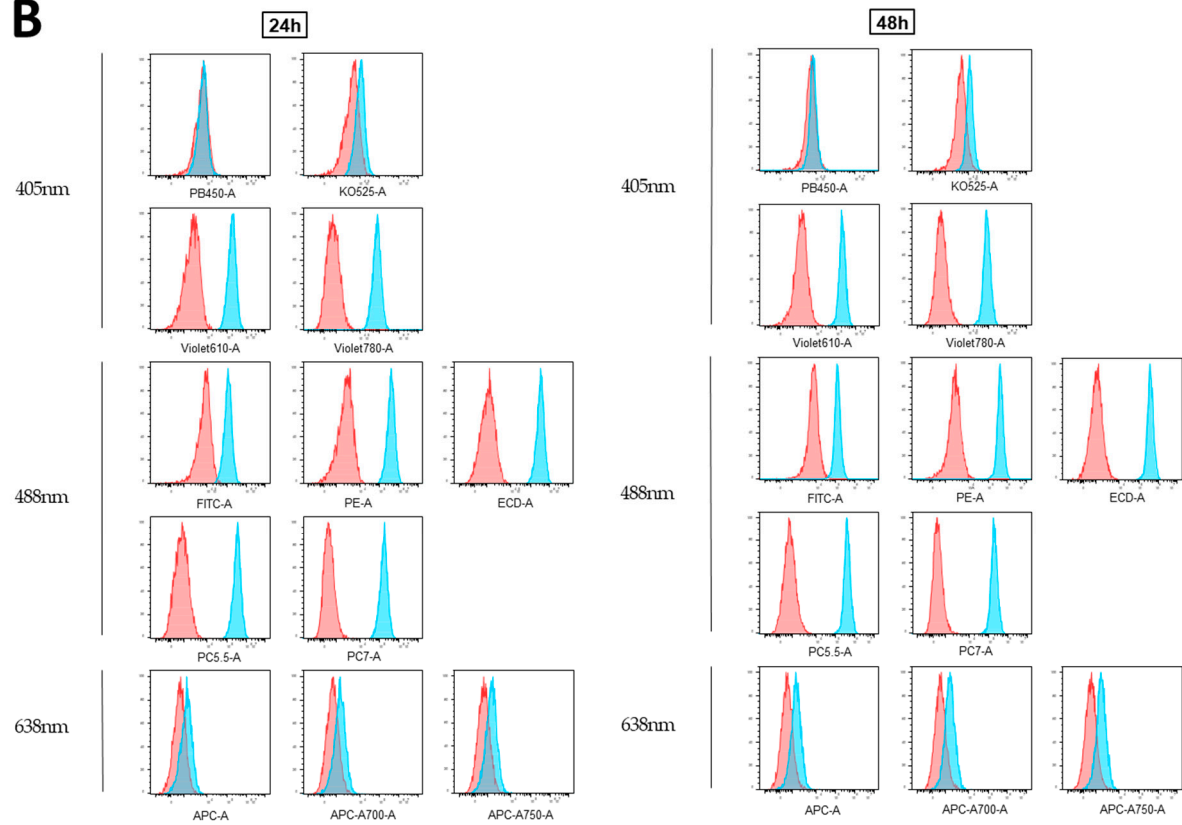

**Figure S5. Analysis of Epirubicin fluorescence emission by a CytoFLEX.** Cells treated for 24 and 48h with 1 $\mu$ M (**Panel A**) or 2.5  $\mu$ M (**Panel B**) Epirubicin were acquired by flow cytometry and shown as blue histograms on every channel of a conventional instrument BC CytoFLEX, equipped with three lasers (488nm, 633nm and 405nm). Overlaid red histograms show the related untreated samples. Data are representative of three separate experiments.
